# Supplementary material for: Implications of gas-barrier properties in realizing the self-recovery of photodegraded CsPbBr3 perovskite nanocrystals
Source: Royal Society of Chemistry journal article supplement (doi:10.1039/d1tc05077j), 2021-12-10
Supplement: d1tc05077j1.pdf [file d1tc05077j1.pdf]

## **Electronic Supplementary Information**

*Journal of Materials Chemistry C*

# **Implications of Gas-Barrier Properties in Realizing the Self-Recovery of Photodegraded CsPbBr<sub>3</sub> Perovskite Nanocrystals**

Ikumi Enomoto, Yoshiki Iso<sup>\*</sup> and Tetsuhiko Isobe<sup>\*</sup>

Department of Applied Chemistry, Faculty of Science and Technology, Keio  
University, 3-14-1 Hiyoshi, Kohoku-ku, Yokohama 223-8522, Japan

\*Corresponding Authors:

Yoshiki Iso – E-mail: [iso@applc.keio.ac.jp](mailto:iso@applc.keio.ac.jp); Tel.: +81 45 566 1558; Fax: +81 45  
566 1551; [orcid.org/0000-0001-7483-2828](https://orcid.org/0000-0001-7483-2828)

Tetsuhiko Isobe – E-mail: [isobe@applc.keio.ac.jp](mailto:isobe@applc.keio.ac.jp); Tel.: +81 45 566 1554; Fax:  
+81 45 566 1551; [orcid.org/0000-0002-0868-5425](https://orcid.org/0000-0002-0868-5425)

## Experimental section

### *Materials*

$\text{Cs}_2\text{CO}_3$  (99.99%, Mitsuwa Pure Chemical),  $\text{PbBr}_2$  (99%, Mitsuwa Pure Chemical), granular EVA polymer (Evaflex EV150, Du Pont-Mitsui Polychemicals), and 15- $\mu\text{m}$ -thick EVOH film (EVAL EF-XL, Kuraray) were used as received without further purification. 1-Octadecene (>90.0%, Tokyo Chemical Industry), oleic acid (>85.0%, Tokyo Chemical Industry), oleylamine (80%–90%, Acros Organics), tert-butanol (>99.0%, Tokyo Chemical Industry), and toluene (>99.5%, Kanto Chemical) were dehydrated over molecular sieves (3A 1/8, FUJIFILM Wako Pure Chemical) prior to use.

### *Preparation of Cs-oleate precursor*

$\text{Cs}_2\text{CO}_3$  (2.50 mmol) was added into a mixture of 1-octadecene (40.0 mL) and oleic acid (2.5 mL). The mixture was dried for 1 h at 120 °C and then heated under Ar gas to 150 °C until the  $\text{Cs}_2\text{CO}_3$  completely dissolved. The Cs-oleate precursor was preheated to 100 °C before injection.

### *Synthesis of CsPbBr<sub>3</sub> NCs*

A mixture of 1-octadecene (5.0 mL) and PbBr<sub>2</sub> (0.376 mmol) was vacuum dried for 1 h at 120 °C and then purged with Ar gas. Oleylamine (1.0 mL) and oleic acid (1.0 mL) were added to the mixture, followed by heating to 180 °C. Once the PbBr<sub>2</sub> was completely dissolved, the preheated Cs-oleate precursor was rapidly injected, and 10 s later, the resulting crude CsPbBr<sub>3</sub> NC solution was cooled in an ice-water bath and were aggregated by adding tert-butanol (25.0 mL). Then, the NCs were collected by centrifugation at  $\sim 19,000 \times g$  (13,000 rpm using a rotor with a diameter of 10 cm) for 5 min. After vacuum drying for 1 d, a paste-like NC material was obtained.

### *Preparation of EVA film*

Granular EVA (200 mg) was completely dissolved in toluene (20 mL) under vigorous stirring. Then, 4 mL of the obtained solution was dropped onto a Petri dish with a diameter of 5.8 cm and dried for half a day in an electric desiccator to fabricate an EVA film. The resulting film with a thickness of  $\sim 14 \mu\text{m}$  was cut into a square (25 mm  $\times$  25 mm).

### *Preparation of CsPbBr<sub>3</sub> NCs films*

Silicone rubber film (25 mm × 25 mm × 0.5 mm) with a square hole (5 mm × 5 mm) was placed on a soda-lime glass plate (25 mm × 25 mm × 1 mm) to prepare a film mold (see Fig. S1), which was filled with the paste-like CsPbBr<sub>3</sub> NCs and sealed with a soda-lime glass plate, EVA film, or EVOH film to shut out ambient air. As a reference, an NC film exposed to ambient air was also prepared.

### *Blue LED irradiation of NC films*

The NC films were irradiated using a flat panel blue LED (TE-4556, Nissin Electronics) equipped with a power supply (LPR-10W, Nissin Electronics) for 72 h. The luminescence wavelength and irradiance were 468 nm and 48.5 W m<sup>-2</sup>, respectively. The irradiated sample was stored in the dark. A series of these experiments was performed with thermo-hygrostat (IG401, Yamato Scientific) which was set at 25 °C and 60% relative humidity. Herein, sample temperature was evaluated by a thermography camera (TG167, FLIR). Only a slight increase in temperature was observed after LED irradiation for 24 h, as shown in Fig. S2; therefore, heating by LED irradiation in this research is negligible.

### *Characterization*

XRD profiles were obtained with an X-ray diffractometer (Rint-2200, Rigaku) equipped with a Cu K $\alpha$  radiation source and a monochromator. UV–Vis absorption spectra of dispersion and film samples were measured using UV/visible/near-infrared optical absorption spectrometers (V-750 and V-570, JASCO). The Tauc plot was prepared according to Eq. S1 to determine the  $E_g$  of the NCs [S1].

$$(\alpha h\nu)^{\frac{1}{n}} = A(h\nu - E_g) \quad (S1)$$

where  $\alpha$  is absorbance,  $h$  is the Planck constant,  $\nu$  is frequency, and  $A$  is a constant. The value of  $n$  was 0.5 because CsPbBr<sub>3</sub> is a direct transition-type semiconductor [S2].

PL spectra were measured using a fluorescence spectrometer (FP-8500, JASCO). The obtained spectra were calibrated using a calibrated detector (SID-844, JASCO). PL decay curves were recorded with a fluorescence lifetime spectrometer (Quantaaurus-Tau C11367, Hamamatsu Photonics) equipped with 405-nm LEDs as the light source. The PL decay curves were fitted with the following triexponential equation:

$$f(t) = A_1 \exp\left(-\frac{t}{\tau_1}\right) + A_2 \exp\left(-\frac{t}{\tau_2}\right) + A_3 \exp\left(-\frac{t}{\tau_3}\right) \quad (S2)$$

where  $A_1$ ,  $A_2$ , and  $A_3$  are the amplitudes, and  $\tau_1$ ,  $\tau_2$ , and  $\tau_3$  are the PL lifetimes. The

average PL lifetime  $\langle\tau\rangle$  was calculated using Eq. S3.

$$\langle\tau\rangle = \frac{A_1\tau_1^2 + A_2\tau_2^2 + A_3\tau_3^2}{A_1\tau_1 + A_2\tau_2 + A_3\tau_3} \quad (\text{S3})$$

The particle morphologies were observed using a field-emission transmission electron microscope (Tecnai G<sup>2</sup>, FEI). TEM samples were prepared by vacuum drying a drop of NC dispersion on carbon-reinforced collodion-coated copper grids (COL-C10, Oken Shoji) overnight. XPS spectra were measured on an XPS instrument (JPS-9010TR, JEOL) equipped with an Al K $\alpha$  radiation source. The peak of C 1s at 285.0 eV was used for the charge-up correction.

## References

- S1) J. Tauc and A. Menth, *J. Non-Cryst. Solids*, 1972, **8–10**, 569–585.
- S2) L. Protesescu, S. Yakunin, M. I. Bodnarchuk, F. Krieg, R. Caputo, C. H. Hendon, R. X. Yang, A. Walsh and M. V. Kovalenko, *Nano Lett.*, 2015, **15**, 3692–3696.

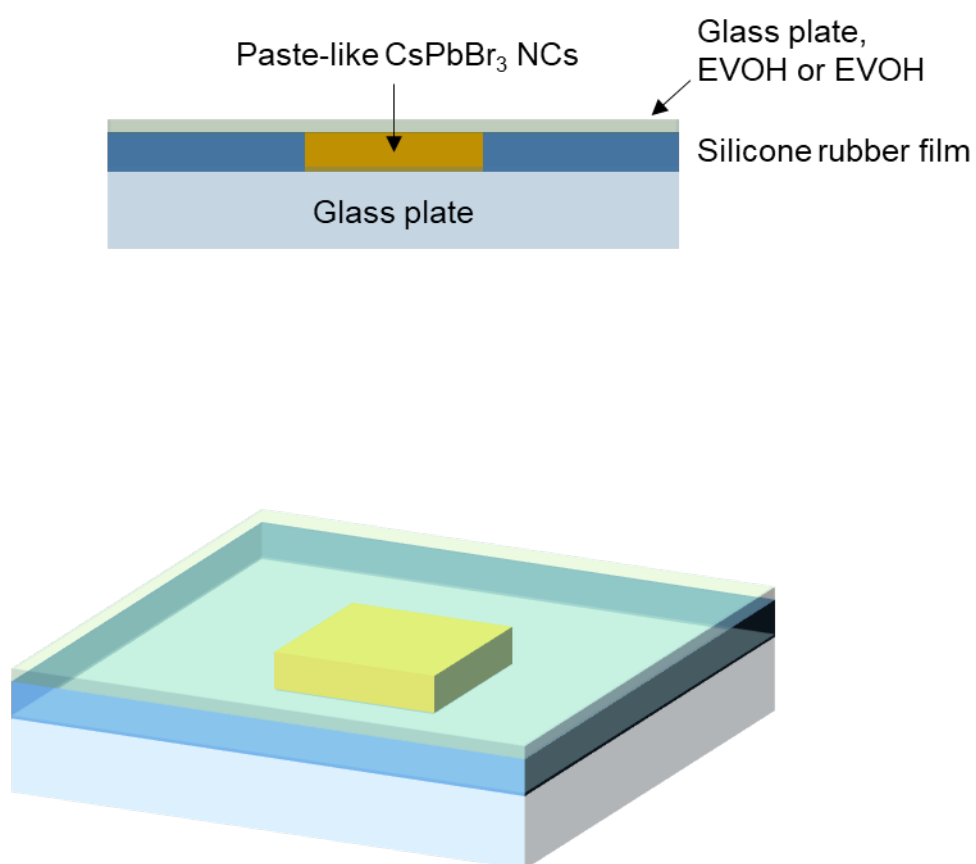

Fig. S1 Schematic structure of a CsPbBr<sub>3</sub> film.

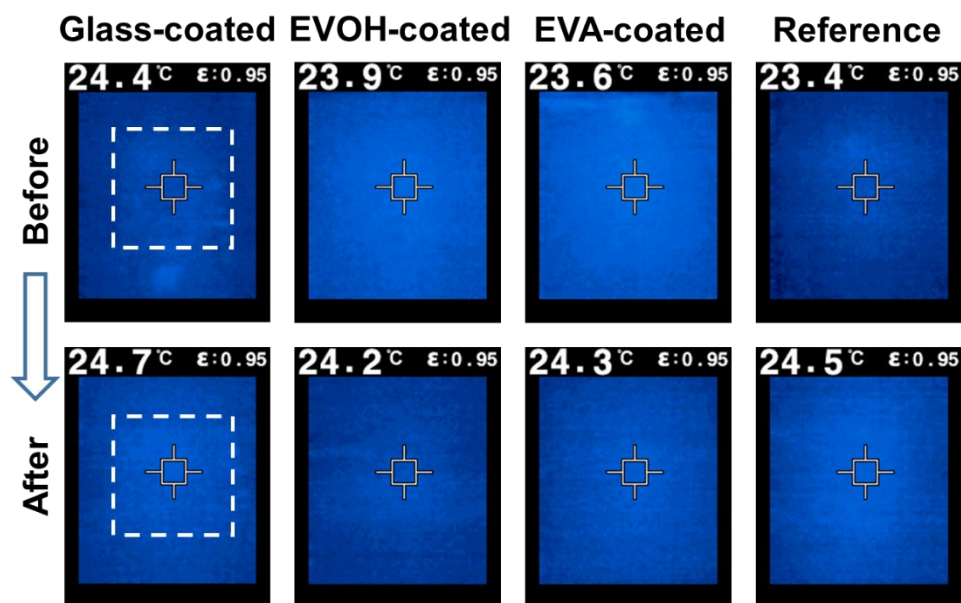

Fig. S2 Thermography images of the prepared CsPbBr<sub>3</sub> NCs films before and after LED irradiation for 24 h. CsPbBr<sub>3</sub> NCs are centered in the dotted area of a glass plate (25 mm × 25 mm).



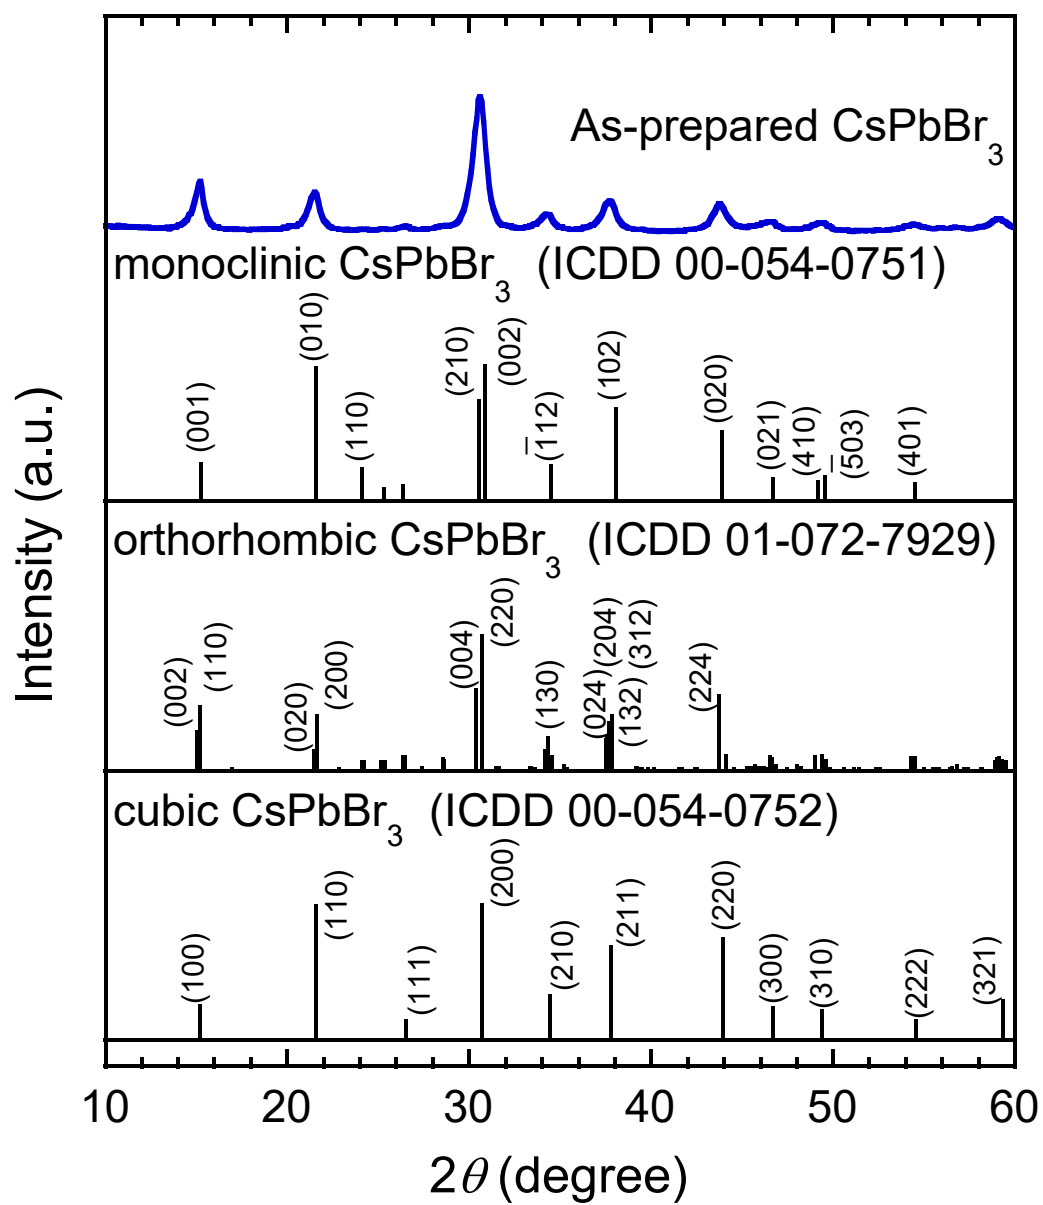

Fig. S3 XRD profile of as-prepared CsPbBr<sub>3</sub> NCs. ICDD card data of representative phases of CsPbBr<sub>3</sub> are also shown.

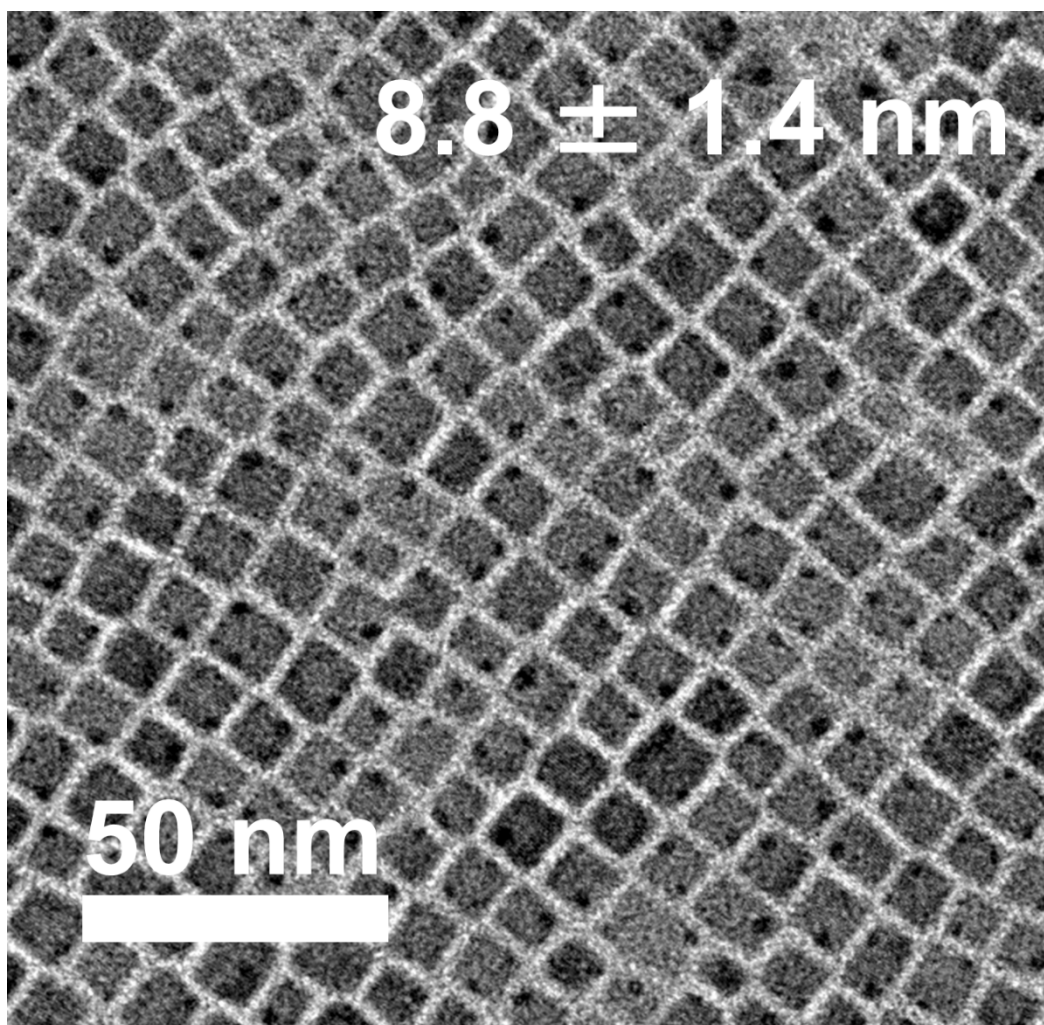

Fig. S4 TEM image of as-prepared CsPbBr<sub>3</sub> NCs.

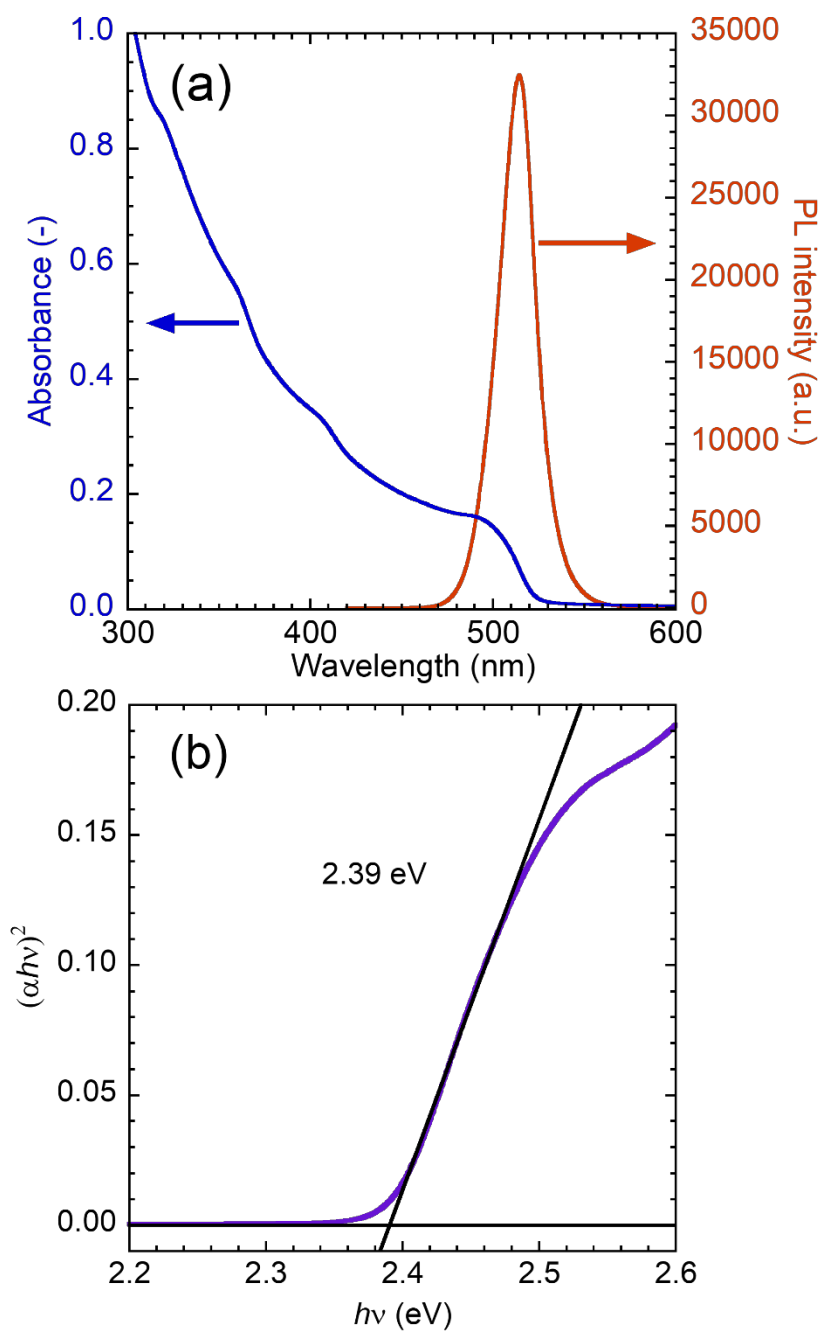

Fig. S5 (a) UV-vis absorption and PL spectra of CsPbBr<sub>3</sub> NCs in toluene.  $\lambda_{\text{ex}} = 400$  nm. (b) Tauc plot derived from the UV-vis spectrum.

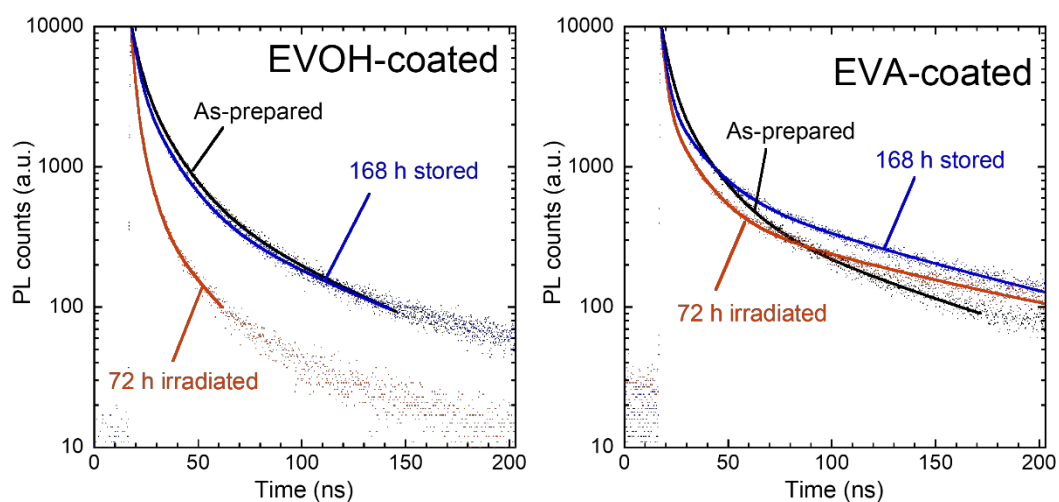

Fig. S6 PL decay curves for the EVOH- and EVA-coated CsPbBr<sub>3</sub> NCs films before and after 72 h irradiation and after 168 h dark storage.  $\lambda_{\text{ex}} = 405$  nm.

Table S1 Summary of PL lifetimes estimated from Fig. S6.

|             |                 | Average PL lifetime (ns) |          |          | Amplitude (%) |       |       | $\chi^2$ |       |
|-------------|-----------------|--------------------------|----------|----------|---------------|-------|-------|----------|-------|
|             |                 | $\langle \tau \rangle$   | $\tau_1$ | $\tau_2$ | $\tau_3$      | $A_1$ | $A_2$ |          | $A_3$ |
| EVOH-coated | As-prepared     | 27.8                     | 3.7      | 13.0     | 57.2          | 53.5  | 39.3  | 7.3      | 1.05  |
|             | 72 h irradiated | 11.1                     | 1.5      | 5.1      | 26.7          | 68.4  | 27.3  | 4.3      | 1.24  |
|             | 168 h stored    | 29.9                     | 3.1      | 12.9     | 63.6          | 60.8  | 33.4  | 5.8      | 1.23  |
| EVA-coated  | As-prepared     | 35.3                     | 3.7      | 14.6     | 76.7          | 63.4  | 31.3  | 5.3      | 1.11  |
|             | 72 h irradiated | 57.0                     | 2.1      | 12.7     | 103.3         | 74.0  | 21.7  | 4.3      | 1.35  |
|             | 168 h stored    | 58.3                     | 2.5      | 14.6     | 96.4          | 70.2  | 23.1  | 6.7      | 1.26  |

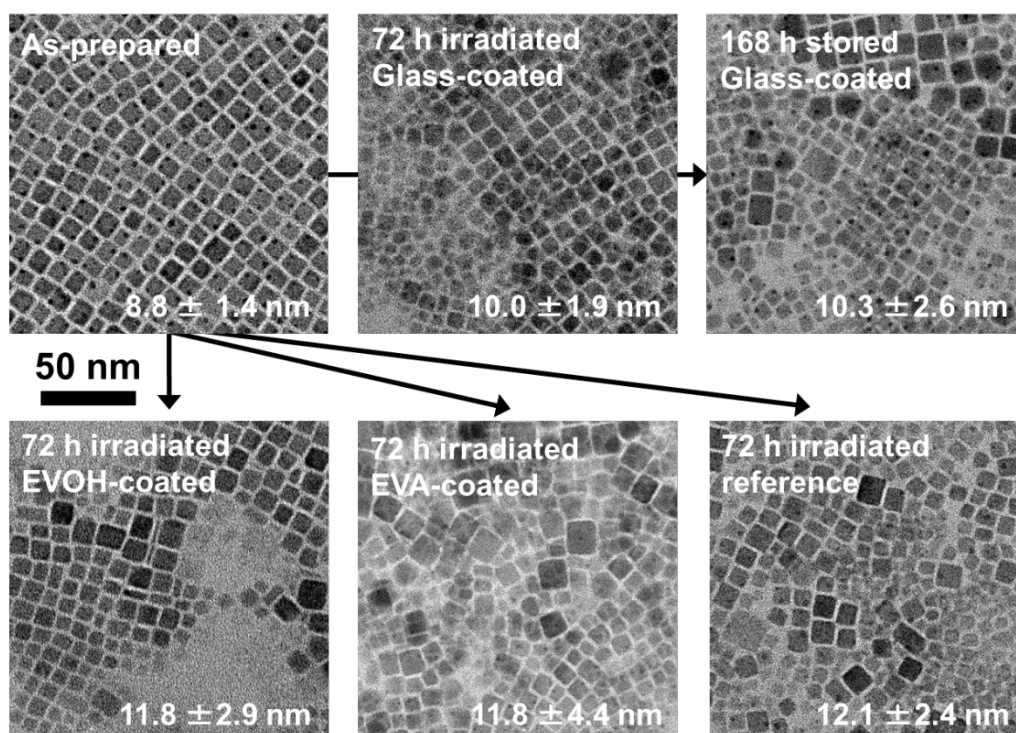

Fig. S7 TEM images of the prepared CsPbBr<sub>3</sub> NCs films before and after 72 h irradiation. The glass-coated NCs film upon subsequent 168 h dark storage is also shown.

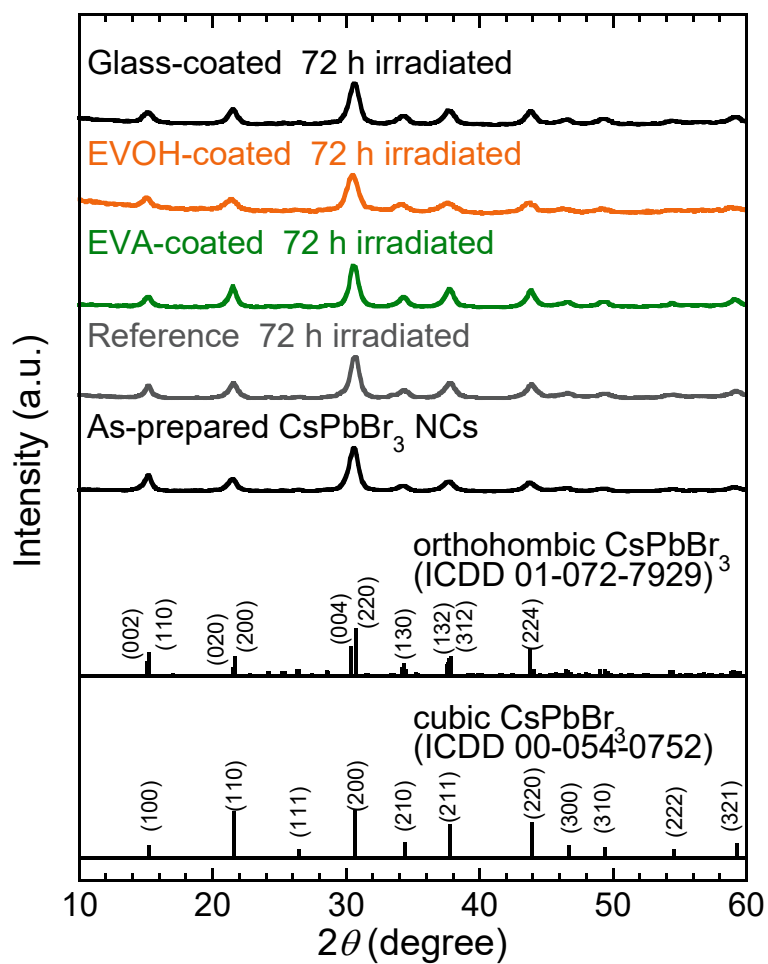

Fig. S8 XRD profiles of the prepared CsPbBr<sub>3</sub> NCs films before and after 72 h irradiation. ICDD card data of representative phases of CsPbBr<sub>3</sub> are also shown.

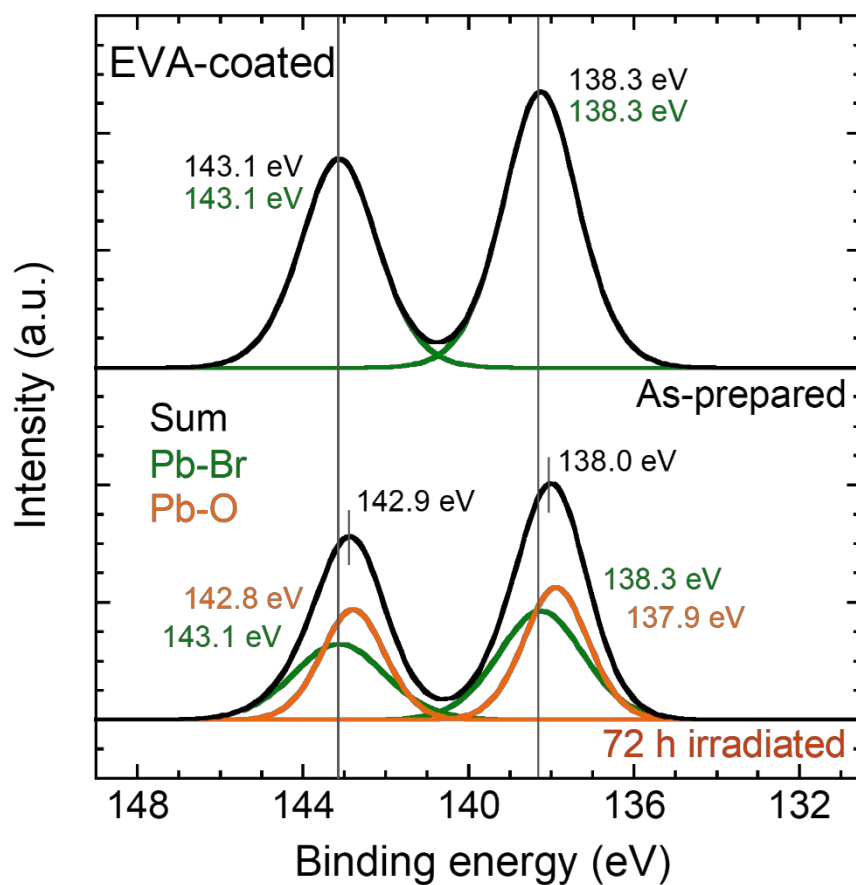

Fig. S9 Deconvolution of the Pb 4f XPS peaks for an EVA-coated NC film irradiated for 72 h. Peak fitting for the as-prepared CsPbBr<sub>3</sub> NCs is also shown.
